# Supplementary material for: Strong π-acceptor sulfonated phosphines in biphasic rhodium-catalyzed hydroformylation of polar alkenes
Source: Royal Society of Chemistry journal article supplement (doi:10.1039/c5cy01004g), 2015-08-12
Supplement: c5cy01004g1.pdf [file c5cy01004g1.pdf]

## **Strong $\pi$ -Acceptor Sulfonated Phosphines in Biphasic Rhodium catalyzed Hydroformylation of Polar Alkenes**

Daniel Peral, Daniel Herrera, Julio Real, Teresa Flor and J. Carles Bayón\*

Departament de Química, Universitat Autònoma de Barcelona, Bellaterra, 08193 Barcelona, Spain.  
Phone: (+34)935812889; e-mail: joancarles.bayon@uab.cat

### **Table of Contents:**

|                                                                                                                                                 |           |
|-------------------------------------------------------------------------------------------------------------------------------------------------|-----------|
| <b>NMR spectra of Danphos type phosphines .....</b>                                                                                             | <b>2</b>  |
| <b>IR spectra of Danphos type phosphines .....</b>                                                                                              | <b>8</b>  |
| <b>HRMS spectra of Danphos type phosphines .....</b>                                                                                            | <b>9</b>  |
| <b><math>^{31}\text{P}\{^1\text{H}\}</math> NMR spectra of Danphos selenides .....</b>                                                          | <b>11</b> |
| <b>Reaction profile of the biphasic hydroformylation of vinyl acetate using 4 equivalents of the sulfonated phosphines .....</b>                | <b>13</b> |
| <b>Reaction profile of the biphasic hydroformylation of vinyl acetate using 20 equivalents of the sulfonated phosphines .....</b>               | <b>13</b> |
| <b>Reaction profile of the recycling experiments of the biphasic hydroformylation of vinyl acetate using Danphos and <i>p</i>-Danphos .....</b> | <b>14</b> |
| <b>Reaction profile of the biphasic hydroformylation of allyl cyanide using 20 equivalents of the sulfonated phosphines .....</b>               | <b>15</b> |
| <b>Reaction profile of the recycling experiments of the biphasic hydroformylation of allyl cyanide using Danphos and <i>p</i>-Danphos .....</b> | <b>16</b> |

# NMR spectra of Danphos type phosphines

## Danphos

$^1\text{H}$  NMR: 400.13 MHz,  $\text{D}_2\text{O}$

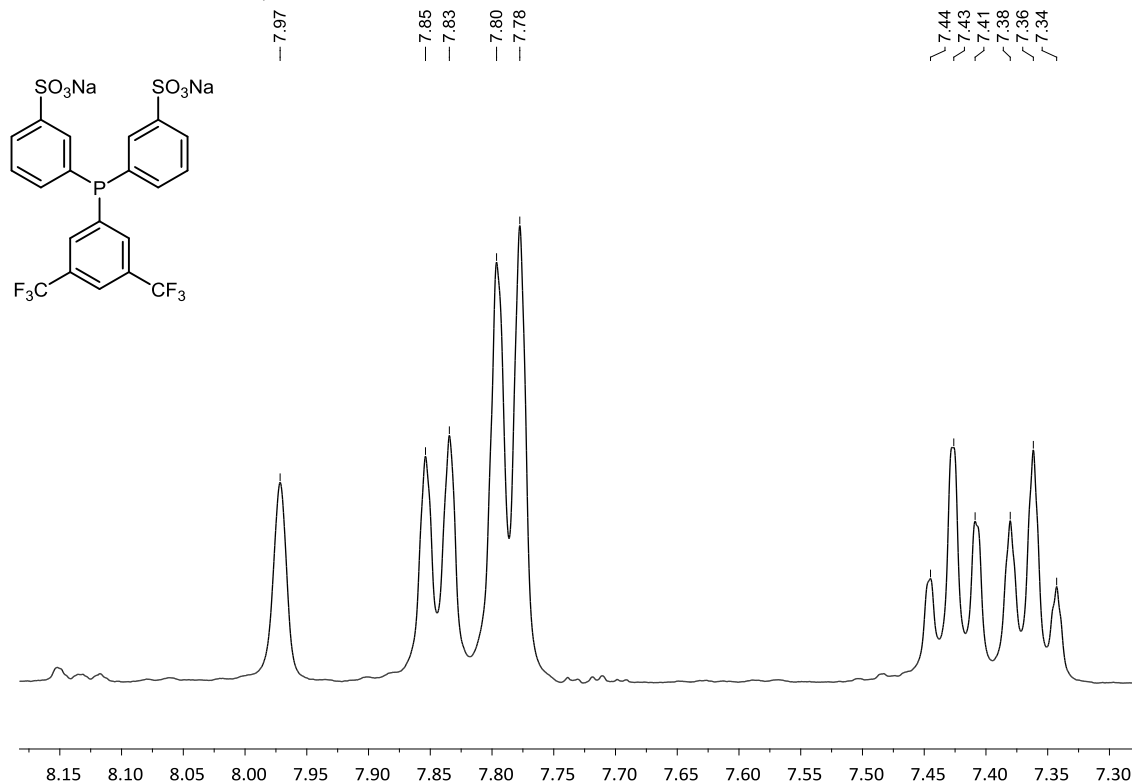

$^{13}\text{C}\{^1\text{H}\}$  NMR: 100.61 MHz,  $\text{D}_2\text{O}$

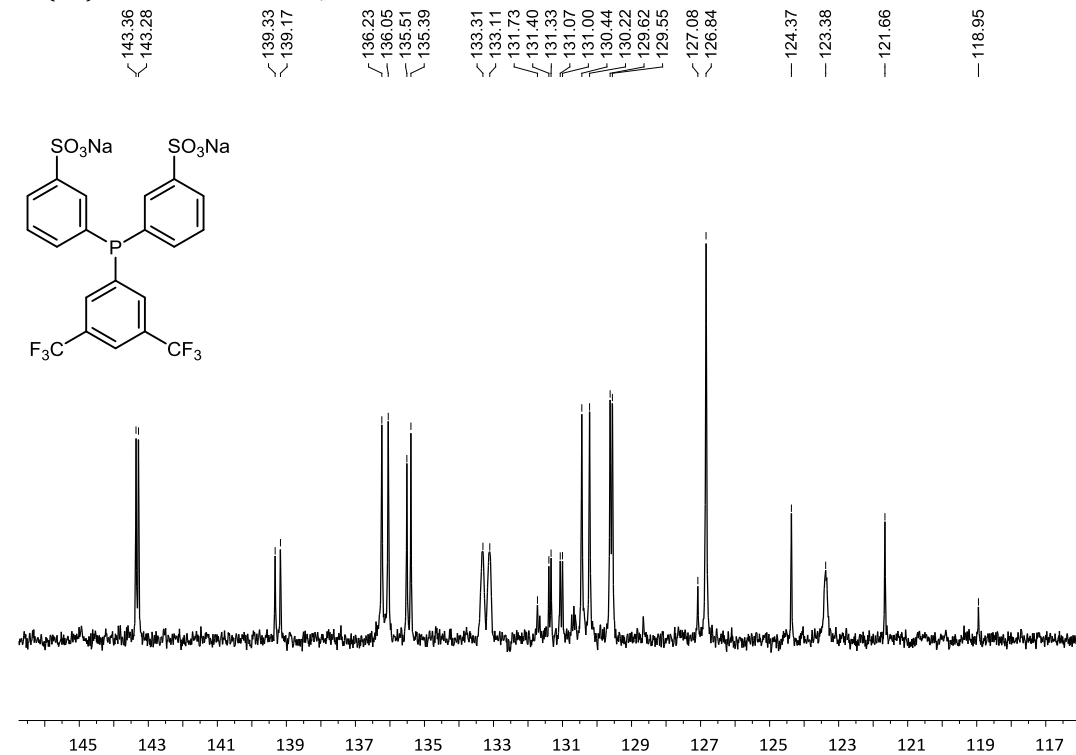

$^{31}\text{P}\{^1\text{H}\}$  NMR: 161.98 MHz,  $\text{D}_2\text{O}$

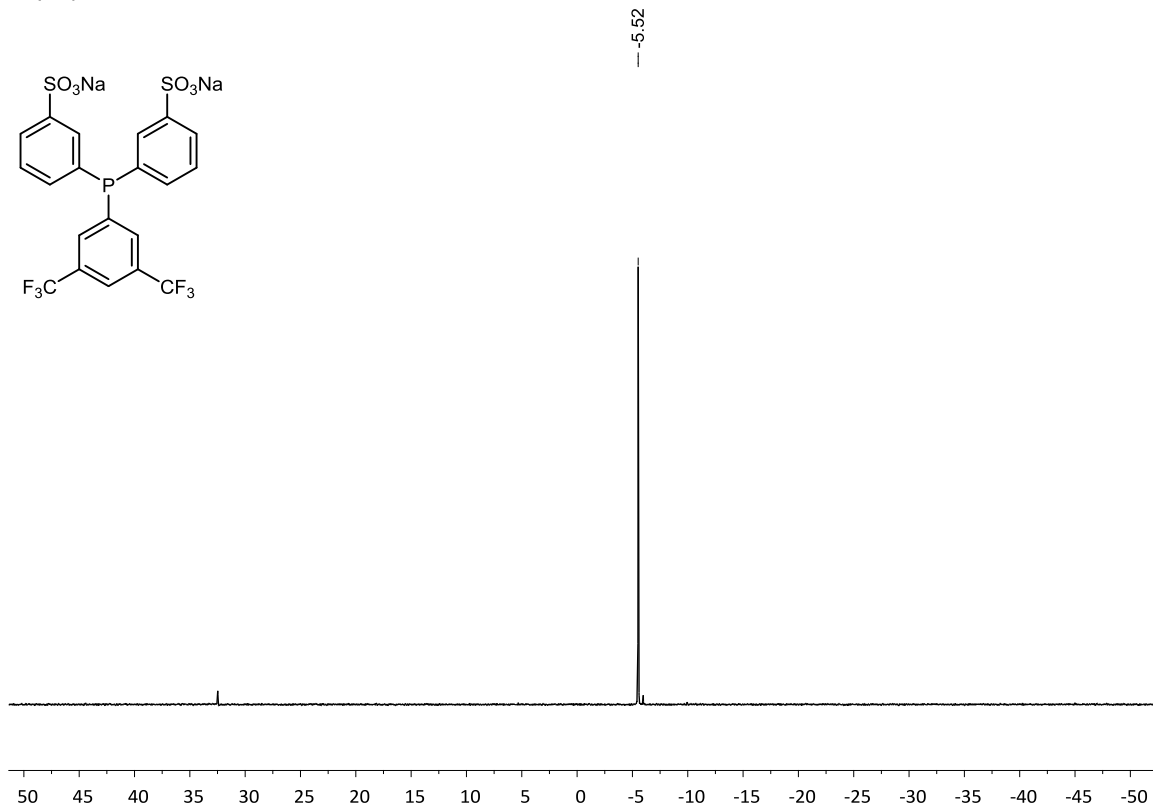

$^{19}\text{F}\{^1\text{H}\}$  NMR: 376.50 MHz,  $\text{D}_2\text{O}$

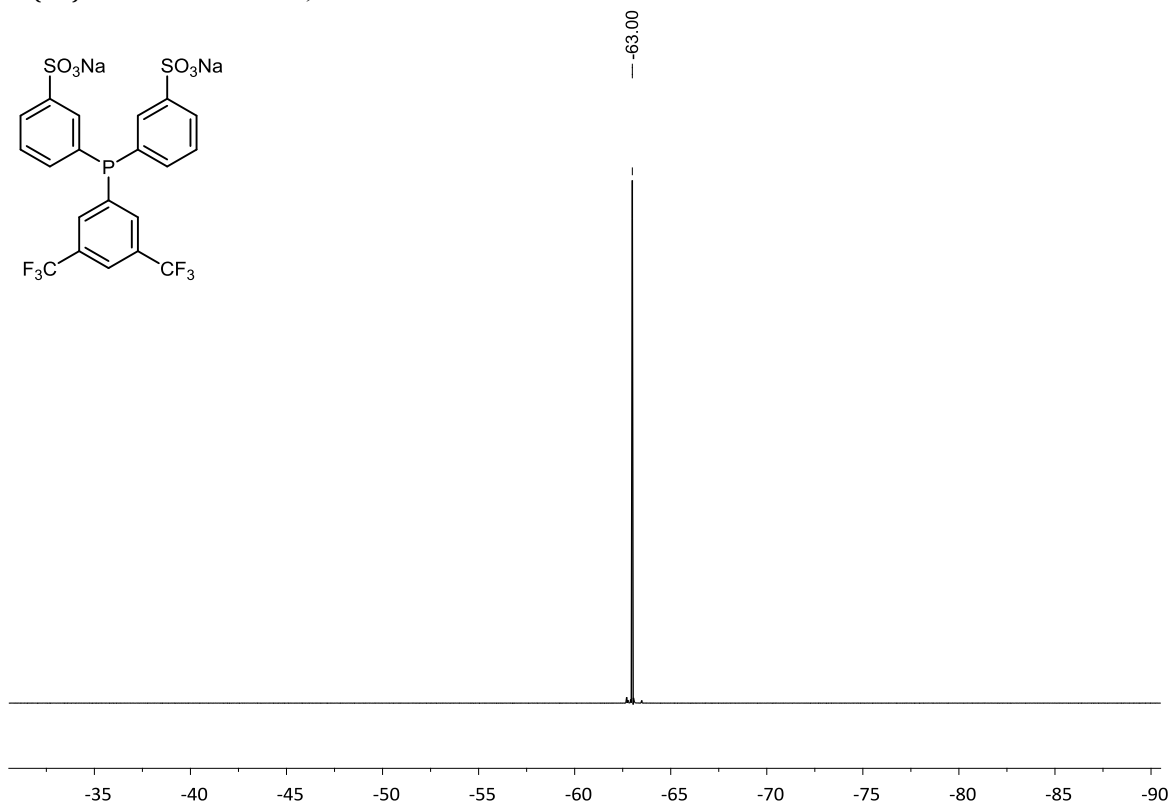

# *p*-Danphos

$^1\text{H}$  NMR: 400.13 MHz,  $\text{D}_2\text{O}$

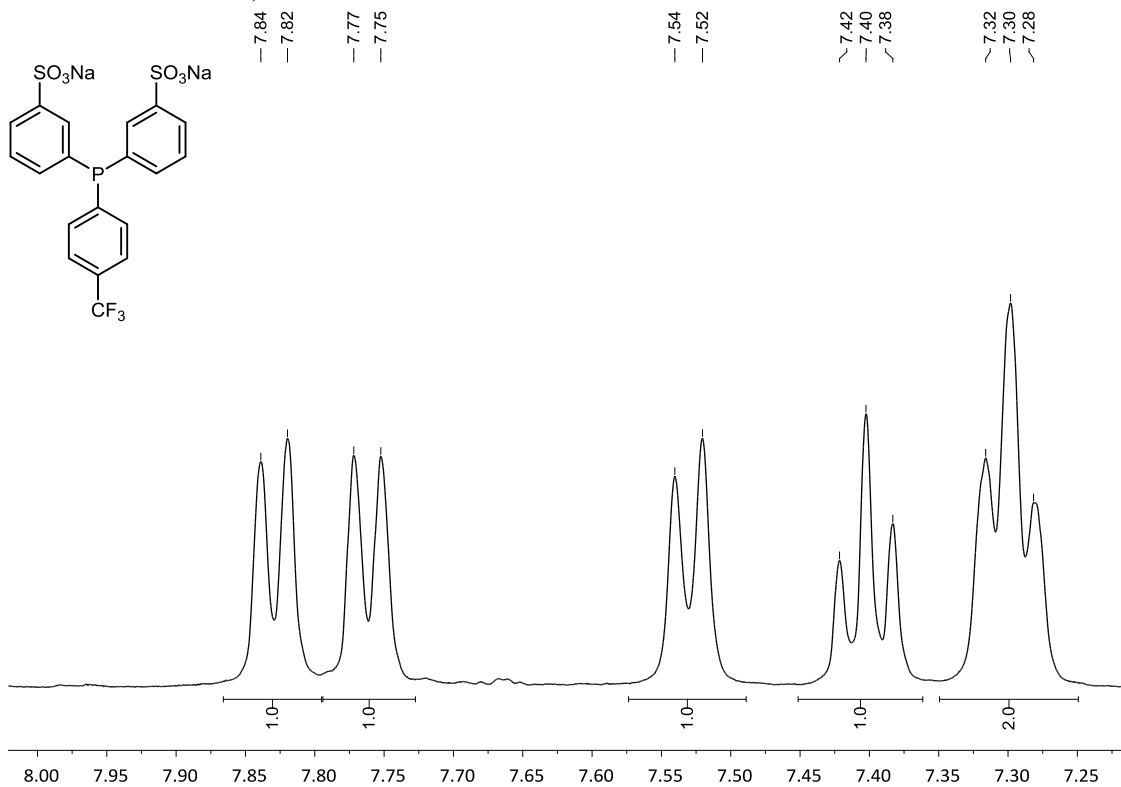

$^{13}\text{C}\{^1\text{H}\}$  NMR: 100.61 MHz,  $\text{D}_2\text{O}$

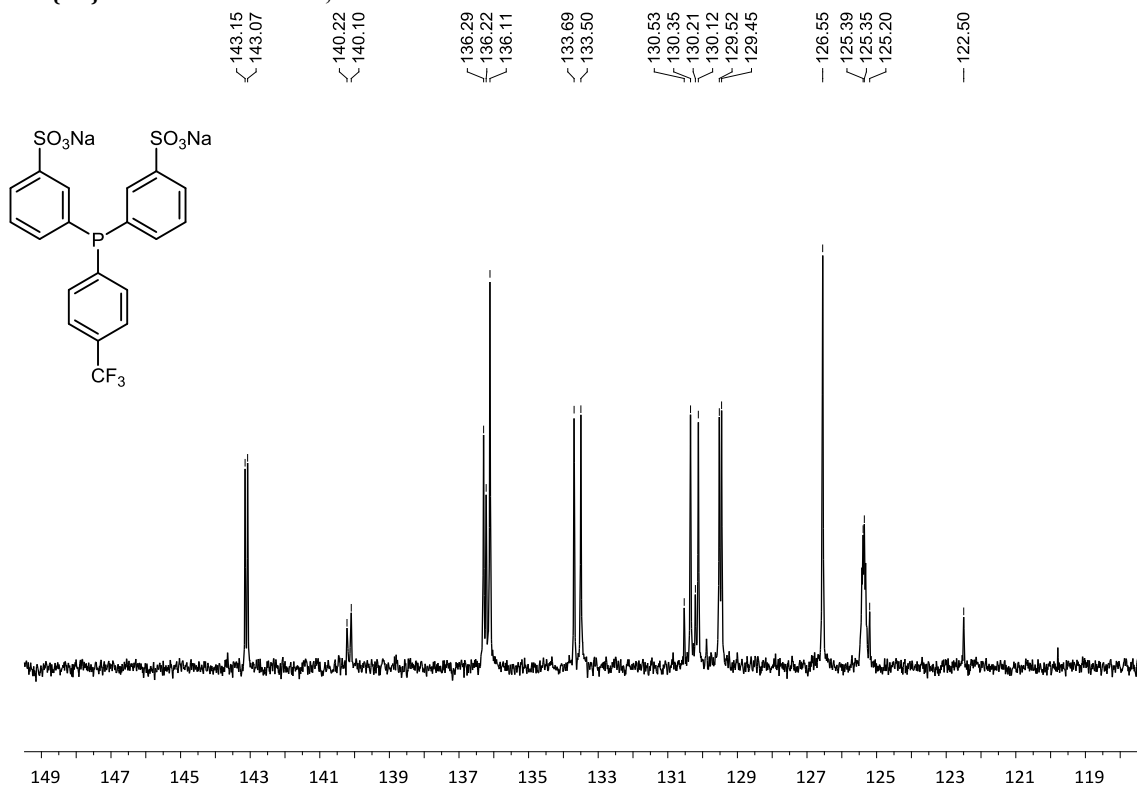

$^{31}\text{P}\{^1\text{H}\}$  NMR: 161.98 MHz,  $\text{D}_2\text{O}$

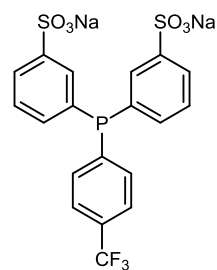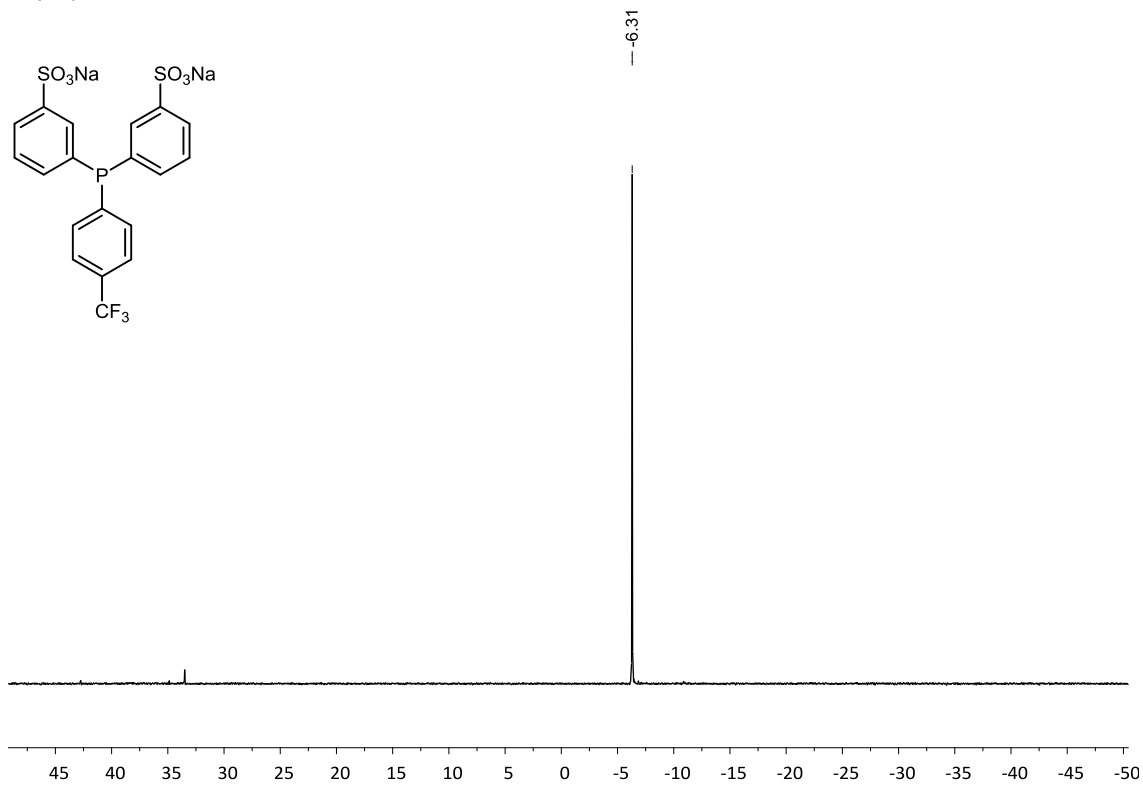

$^{19}\text{F}\{^1\text{H}\}$  NMR: 376.50 MHz,  $\text{D}_2\text{O}$

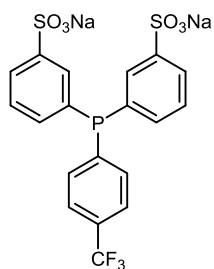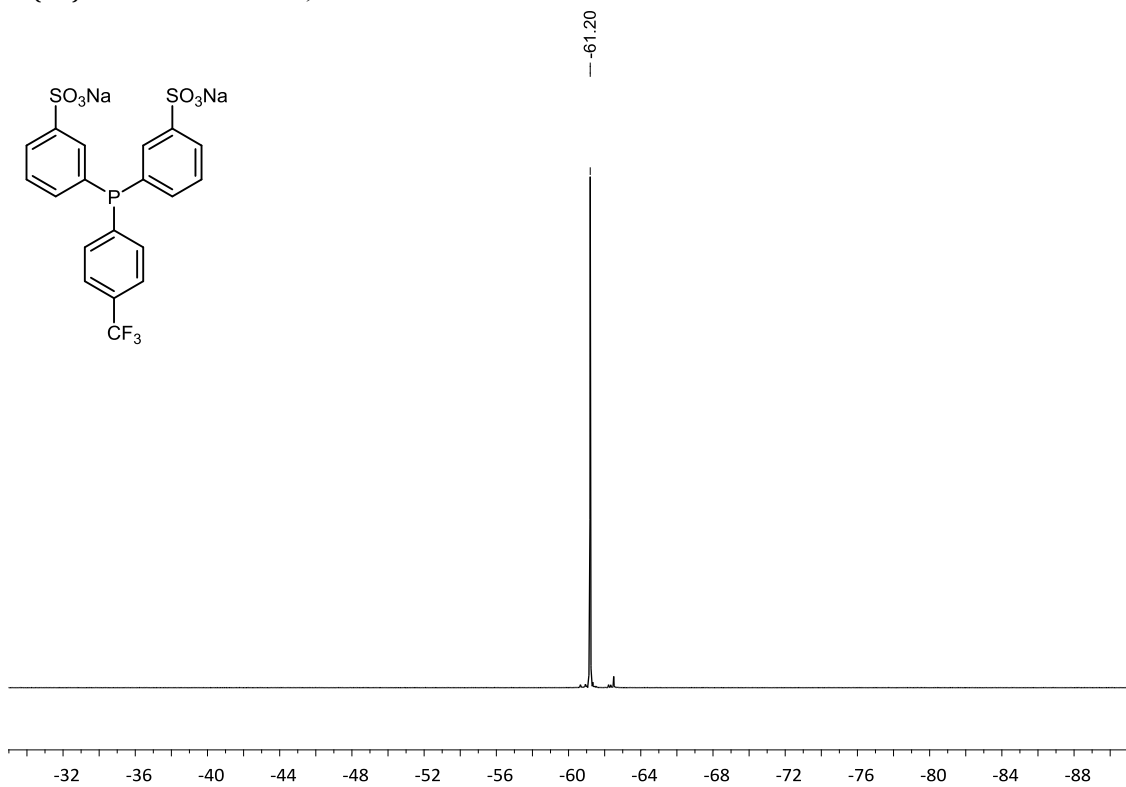

# *o*-Danphos

$^1\text{H NMR}$ : 400.13 MHz,  $\text{D}_2\text{O}$

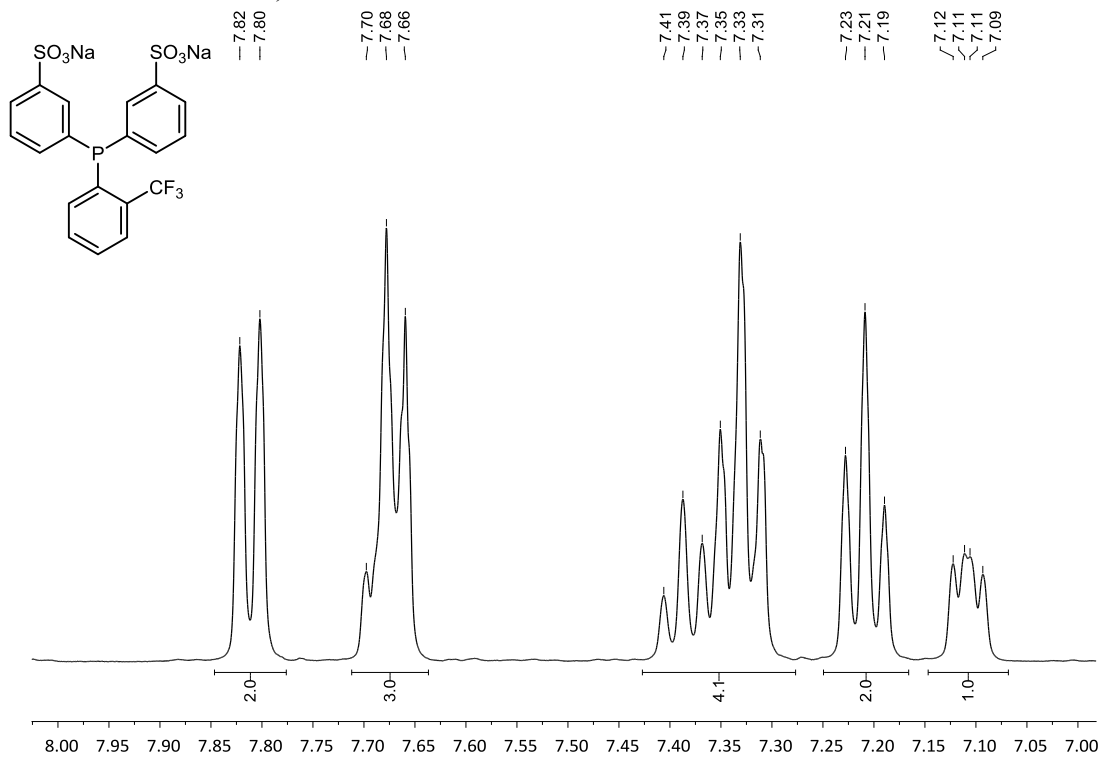

$^{13}\text{C}\{^1\text{H}\}$  NMR: 100.61 MHz,  $\text{D}_2\text{O}$

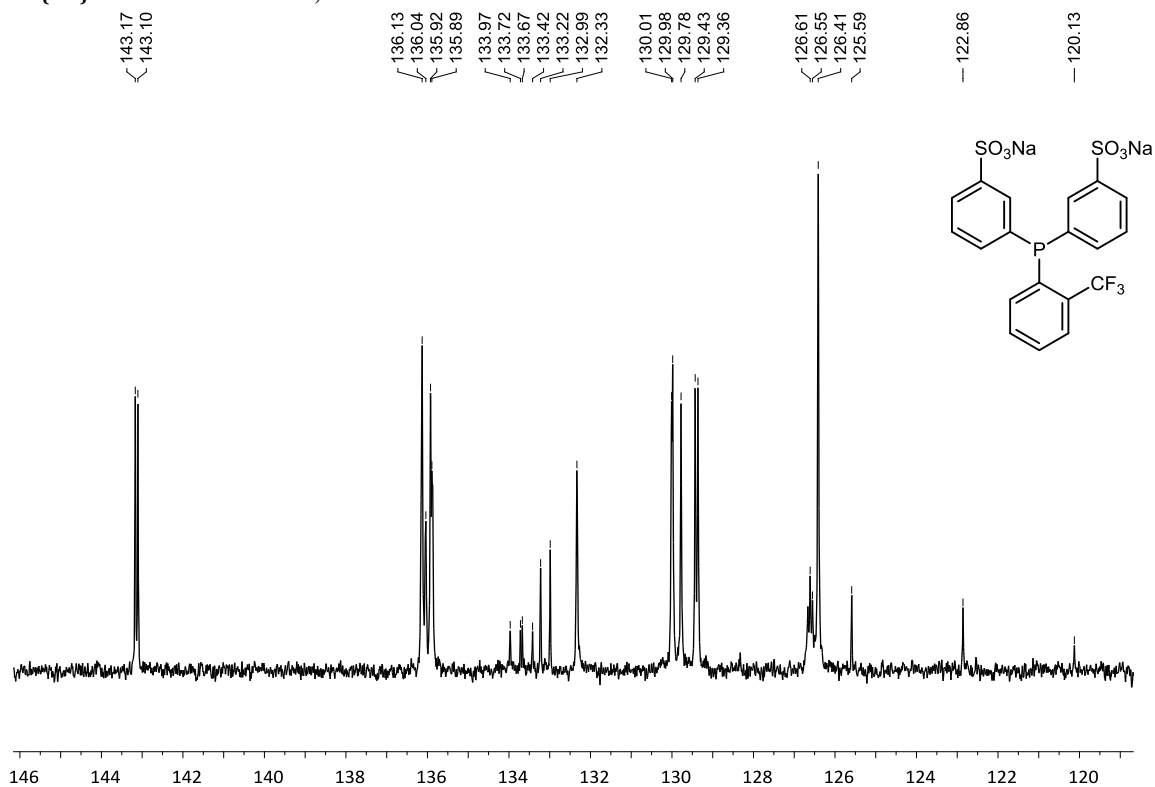

$^{31}\text{P}\{^1\text{H}\}$  NMR: 161.98 MHz,  $\text{D}_2\text{O}$

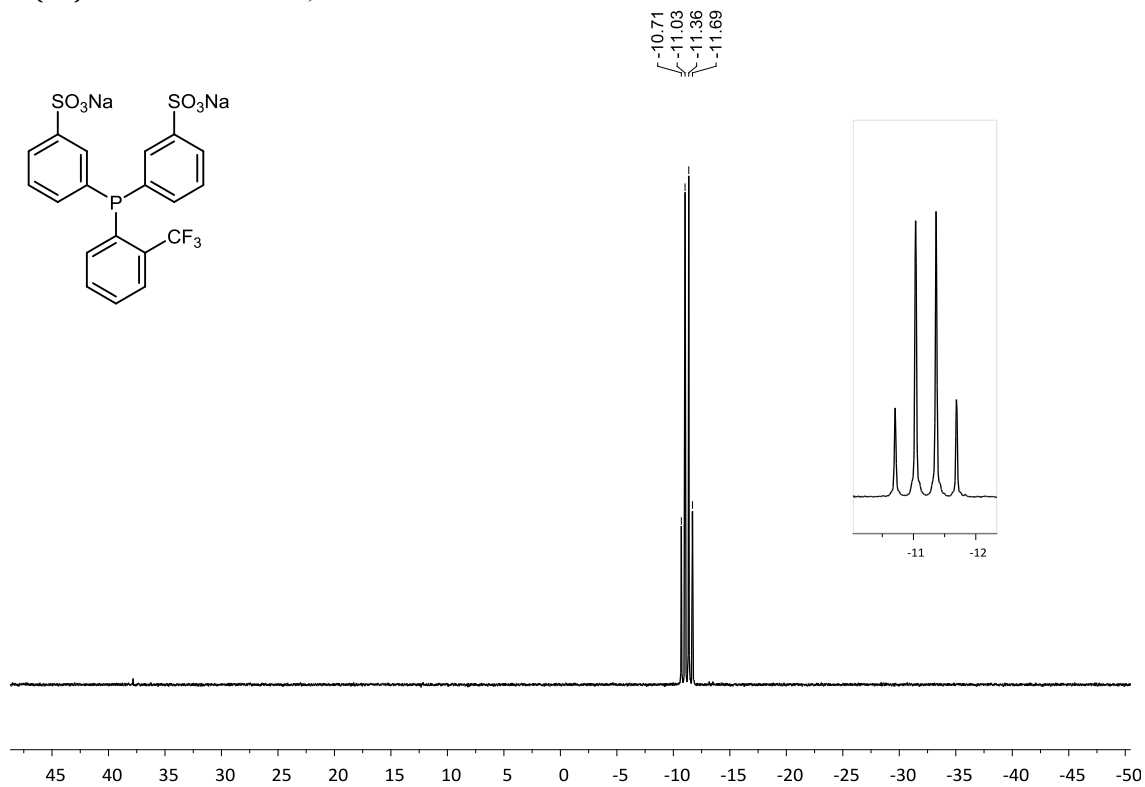

$^{19}\text{F}\{^1\text{H}\}$  NMR: 376.50 MHz,  $\text{D}_2\text{O}$

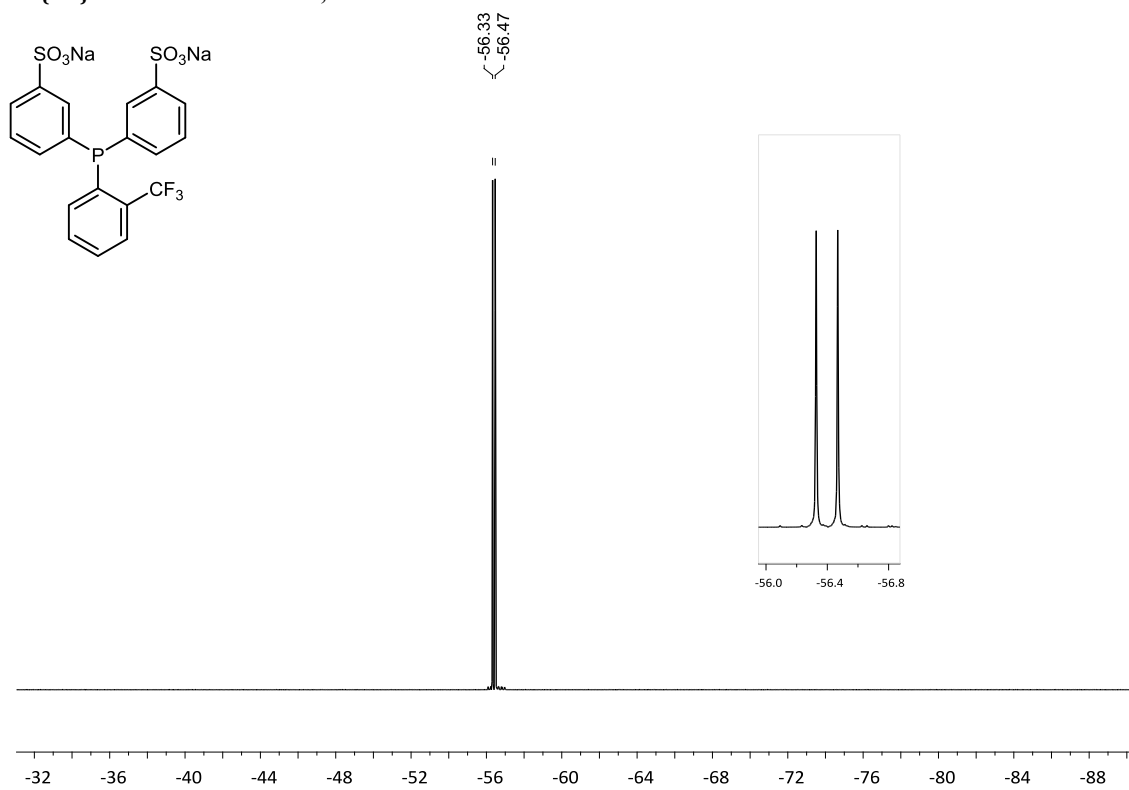

# IR(ATR) spectra of Danphos type phosphine

## Danphos

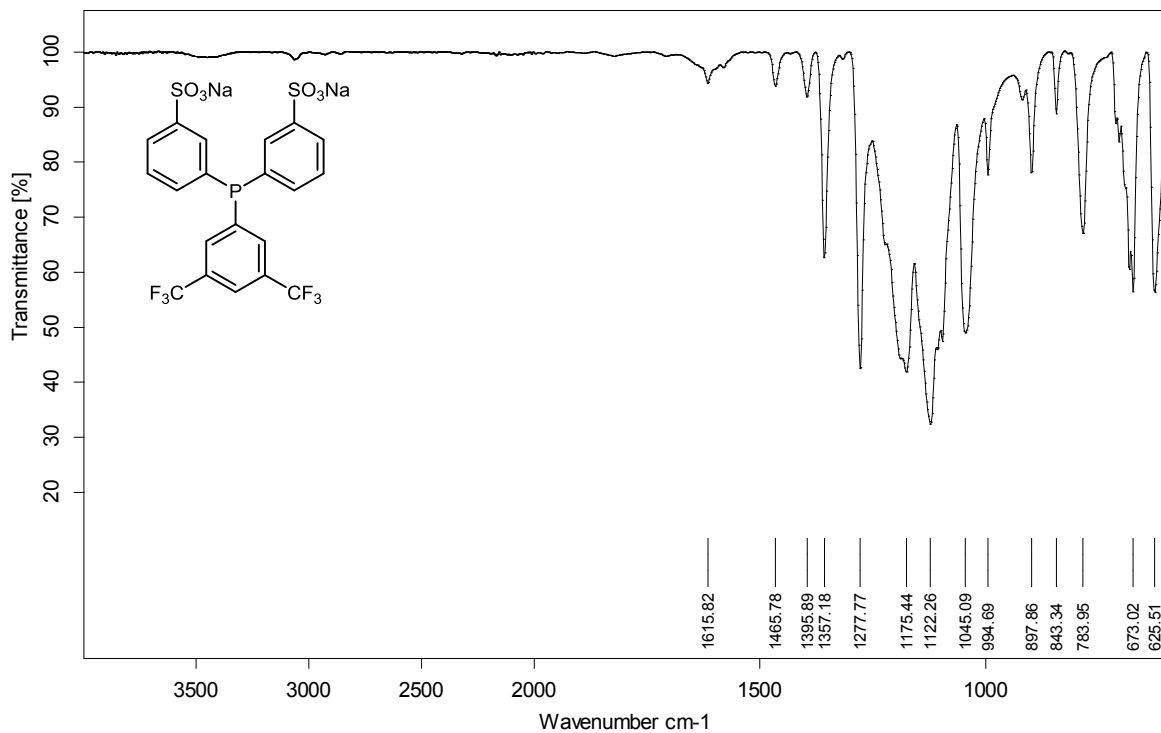

## *p*-Danphos

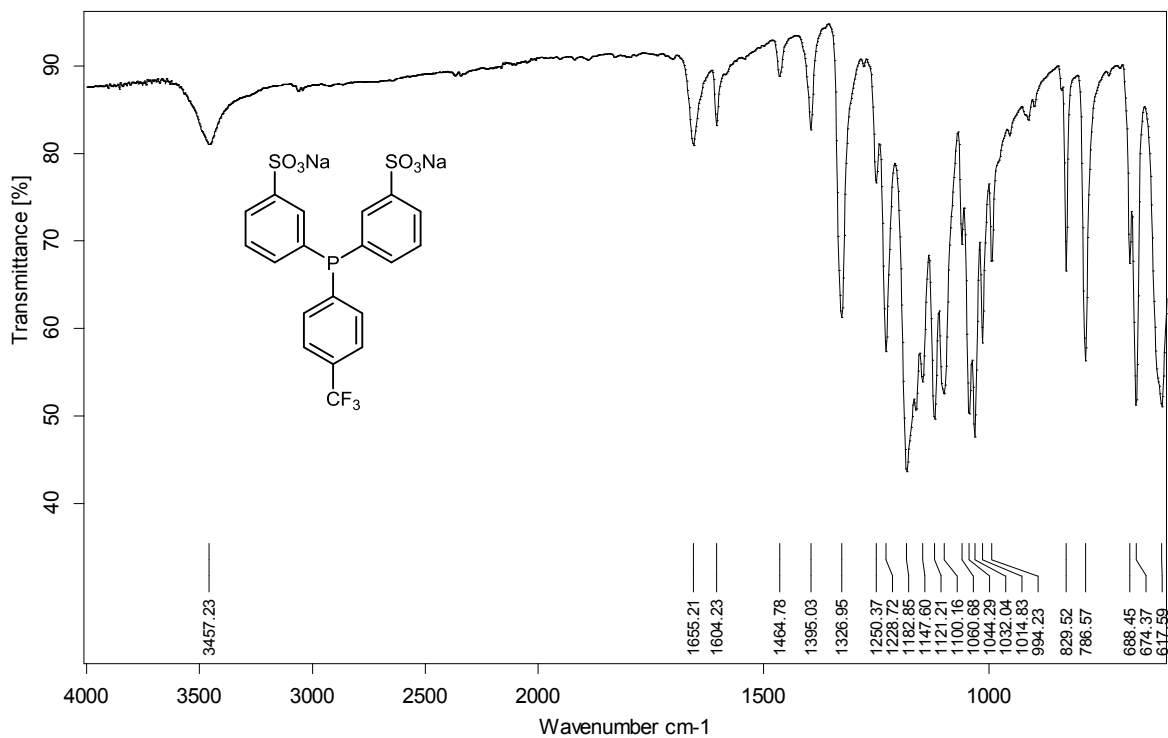



***o*-Danphos**

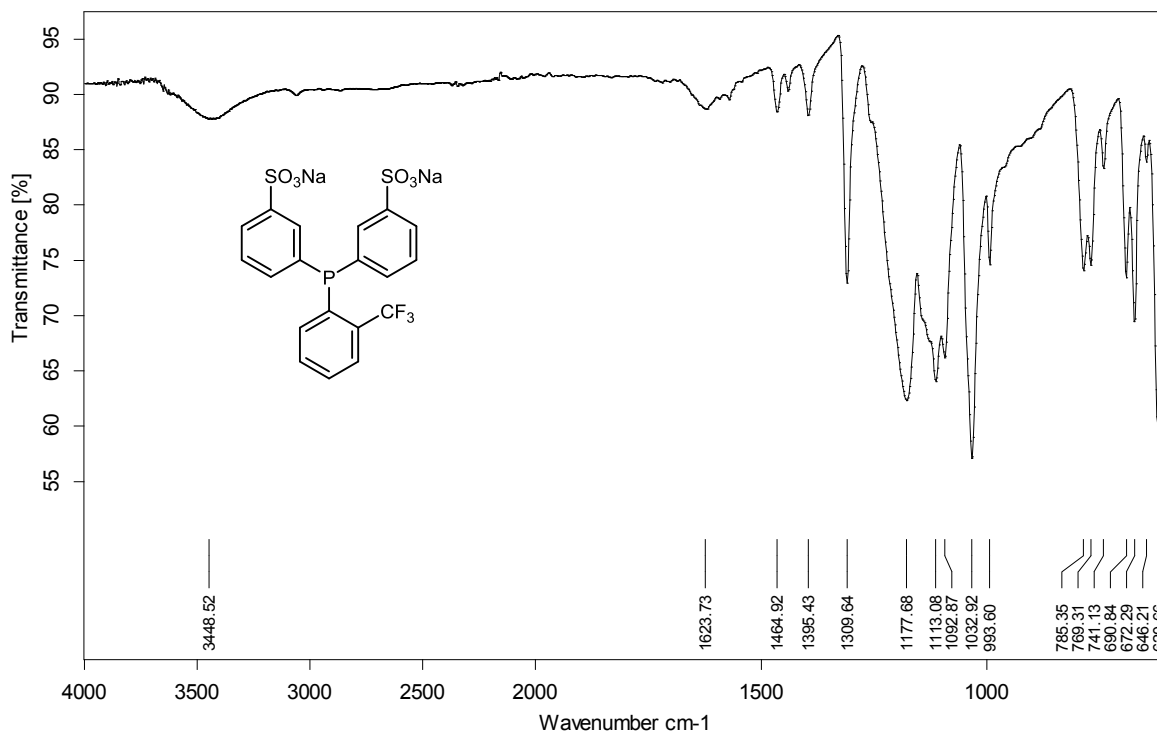

**HRMS spectra of Danphos type phosphines**

**Danphos: HRMS: ESI  $m/z$**

Theoretical Isotopic Distribution

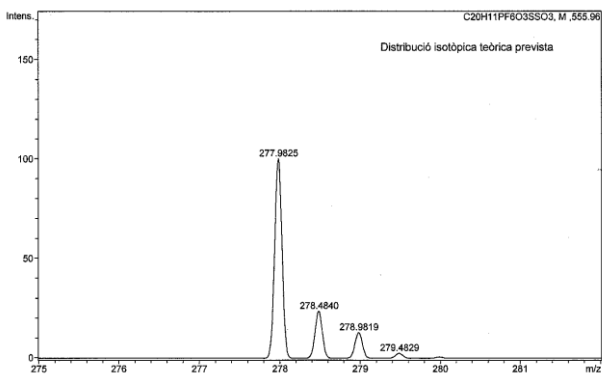

| # | $m/z$    | I   | I %   |
|---|----------|-----|-------|
| 1 | 277.9825 | 100 | 100.0 |
| 2 | 278.4840 | 24  | 23.6  |
| 3 | 278.9819 | 13  | 12.9  |
| 4 | 279.4829 | 3   | 2.5   |
| 5 | 279.9818 | 1   | 0.6   |

Experimental Isotopic Distribution

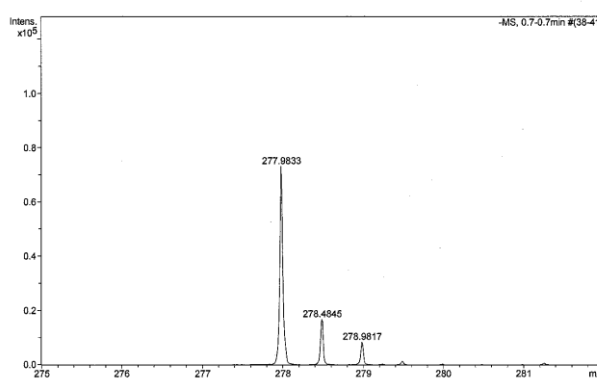

| # | $m/z$    | I     | I %   |
|---|----------|-------|-------|
| 1 | 277.9833 | 73047 | 100.0 |
| 2 | 278.4845 | 16662 | 22.8  |
| 3 | 278.9817 | 8308  | 11.4  |

***p*-Danphos: HRMS: ESI  $m/z$**

Theoretical Isotopic Distribution

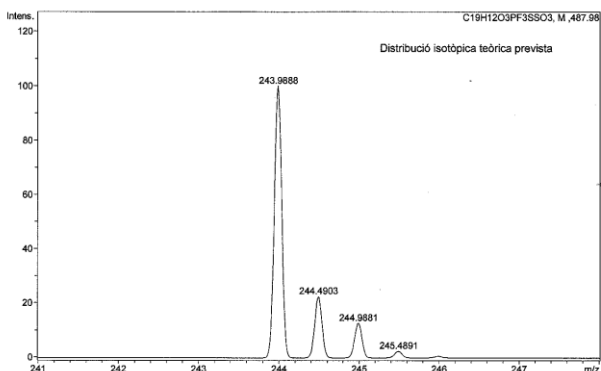

| # | $m/z$    | I   | I%    |
|---|----------|-----|-------|
| 1 | 243.9888 | 100 | 100.0 |
| 2 | 244.4903 | 23  | 22.5  |
| 3 | 244.9881 | 13  | 12.7  |
| 4 | 245.4891 | 2   | 2.4   |
| 5 | 245.9880 | 1   | 0.6   |

Experimental Isotopic Distribution

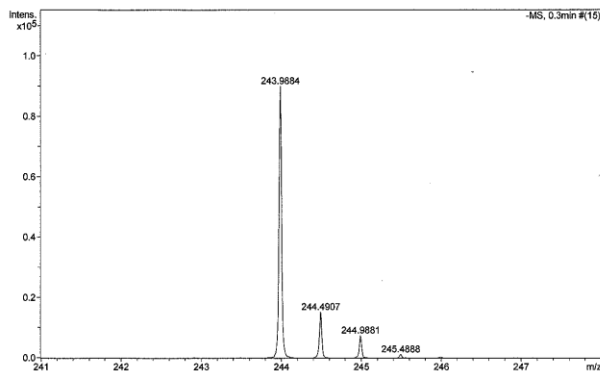

| # | $m/z$    | I     | I%    |
|---|----------|-------|-------|
| 1 | 243.9884 | 89853 | 100.0 |
| 2 | 244.4907 | 15196 | 16.9  |
| 3 | 244.9881 | 7458  | 8.3   |
| 4 | 245.4888 | 1187  | 1.3   |
| 5 | 245.9897 | 391   | 0.4   |

***o*-Danphos: HRMS: ESI  $m/z$**

Theoretical Isotopic Distribution

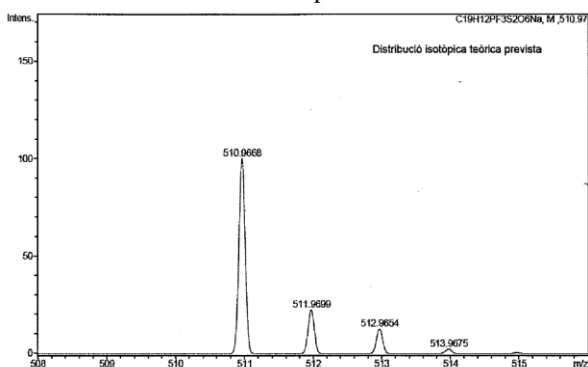

| # | $m/z$    | I   | I%    |
|---|----------|-----|-------|
| 1 | 510.9668 | 100 | 100.0 |
| 2 | 511.9699 | 23  | 22.5  |
| 3 | 512.9654 | 13  | 12.7  |
| 4 | 513.9675 | 2   | 2.4   |
| 5 | 514.9652 | 1   | 0.6   |

Experimental Isotopic Distribution

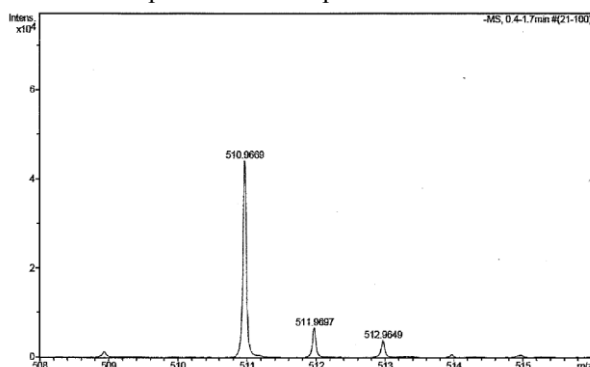

| # | $m/z$    | I     | I%    |
|---|----------|-------|-------|
| 1 | 510.9669 | 44152 | 100.0 |
| 2 | 511.9697 | 6600  | 14.9  |
| 3 | 512.9649 | 3870  | 8.8   |
| 4 | 513.9655 | 577   | 1.3   |

## $^{31}\text{P}\{^1\text{H}\}$ NMR spectra of Danphos selenides

Danphos Selenide:  $^{31}\text{P}\{^1\text{H}\}$  NMR spectrum

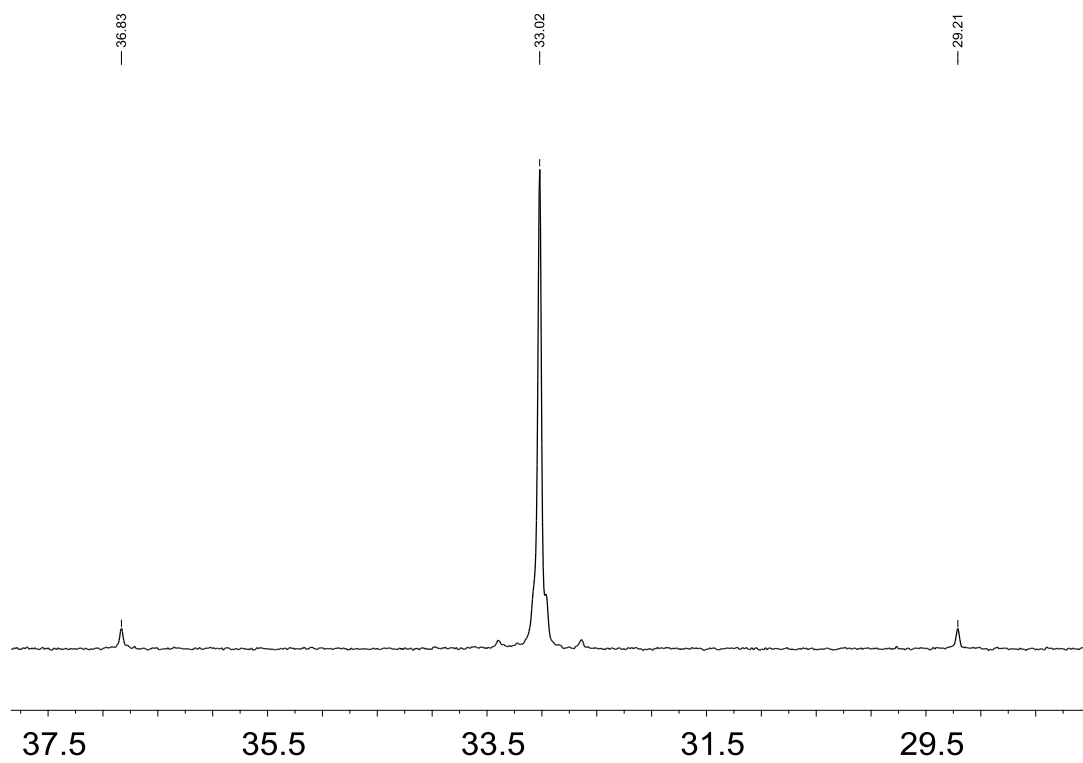

*p*-Danphos Selenide:  $^{31}\text{P}\{^1\text{H}\}$  NMR spectrum

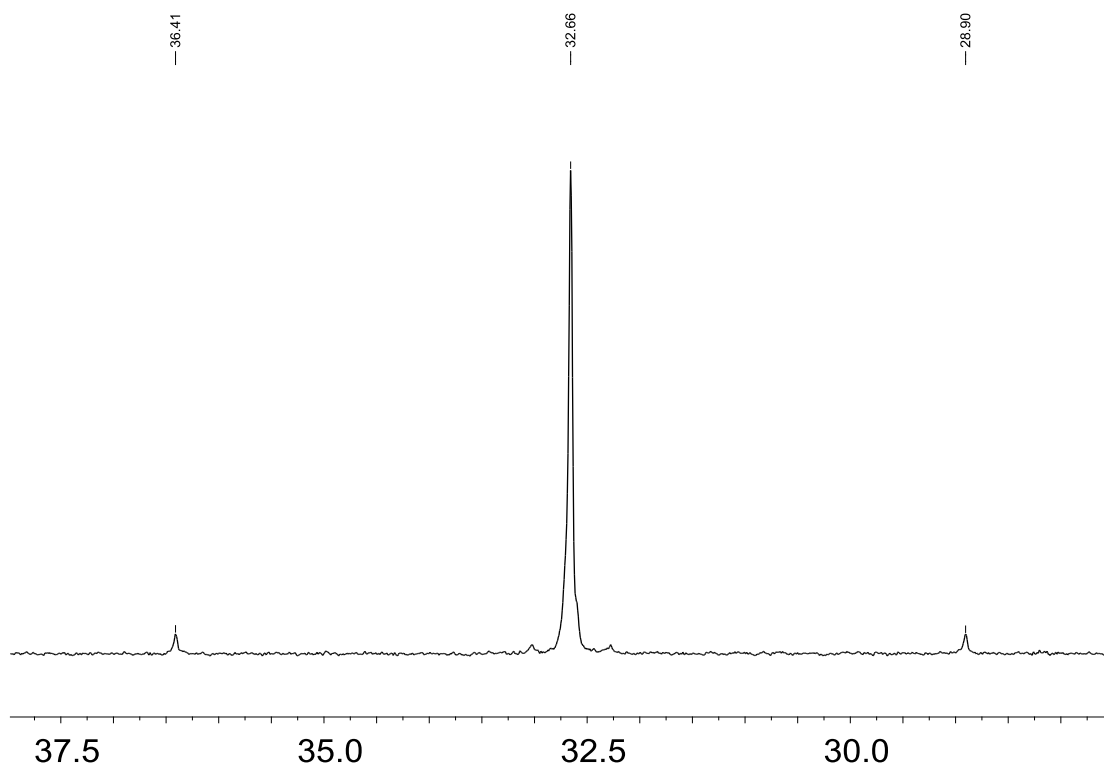

***o*-Danphos Selenide:  $^{31}\text{P}\{^1\text{H}\}$  NMR spectrum**

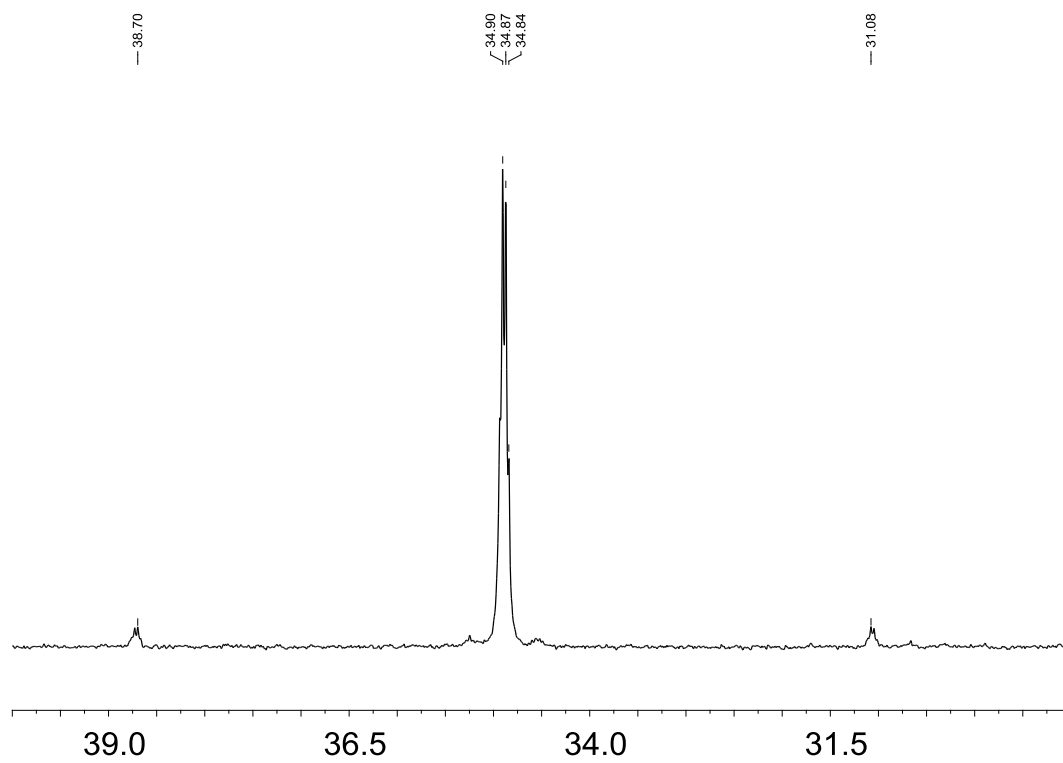

**Reaction profile of the biphasic hydroformylation of vinyl acetate using 4 equivalents of the sulfonated phosphines.**

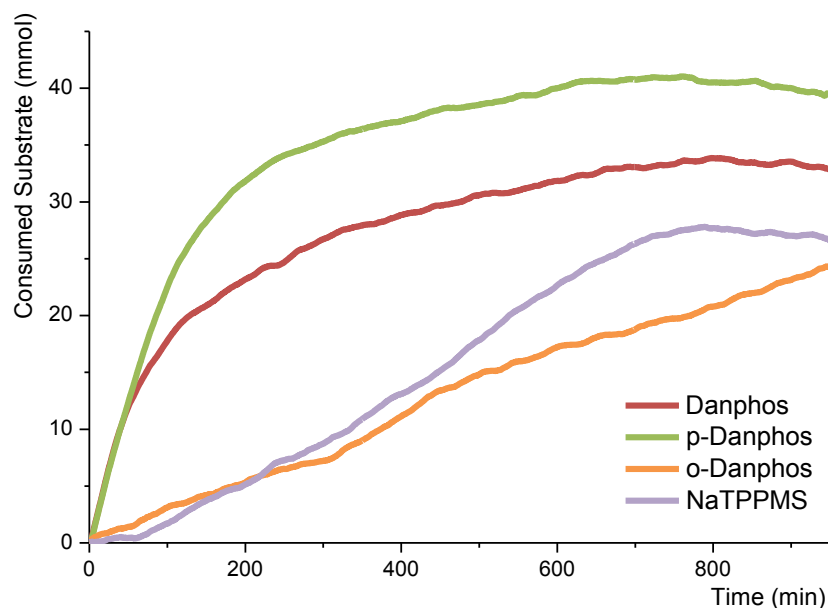

**Figure.** Substrate consumed (mmol) *versus* time (min) in the biphasic hydroformylation of vinyl acetate with sulfonated phosphines. Conditions: [Rh]:[L]:[substrate] = 1:4:2500 (43.4 mmol vinyl acetate), 2 ml H<sub>2</sub>O, 6 ml toluene, 80 °C, 30 bar CO:H<sub>2</sub> (1:1), 16h.

**Reaction profile of the biphasic hydroformylation of vinyl acetate using 20 equivalents of the sulfonated phosphines.**

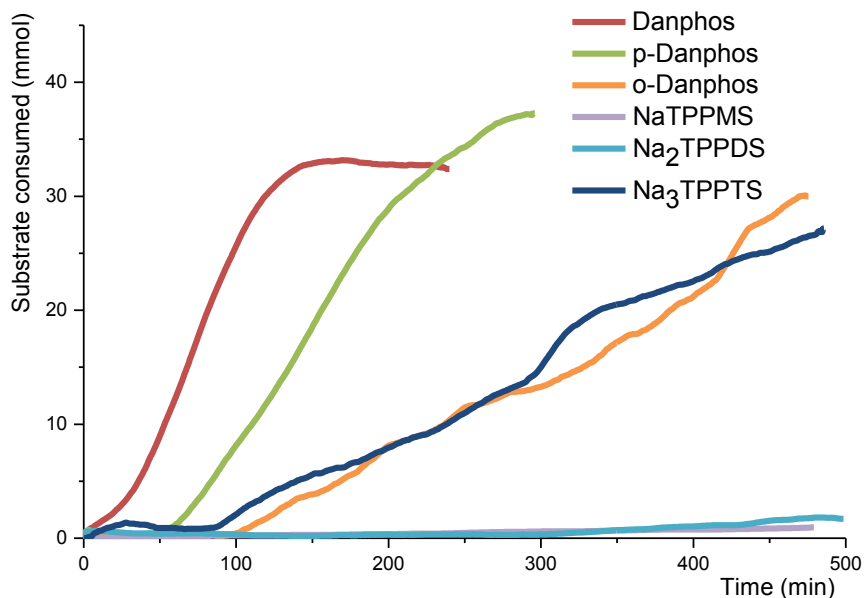

**Figure.** Substrate consumed (mmol) *versus* time (min) in the biphasic hydroformylation of vinyl acetate with sulfonated phosphines. Conditions: [Rh]:[L]:[substrate] = 1:20:2500 (43.4 mmol vinyl acetate), 3 ml toluene, 5 ml H<sub>2</sub>O, 80 °C, 30 bar CO:H<sub>2</sub> (1:1).

## Reaction profile of the recycling experiments of the biphasic hydroformylation of vinyl acetate using Danphos and *p*-Danphos

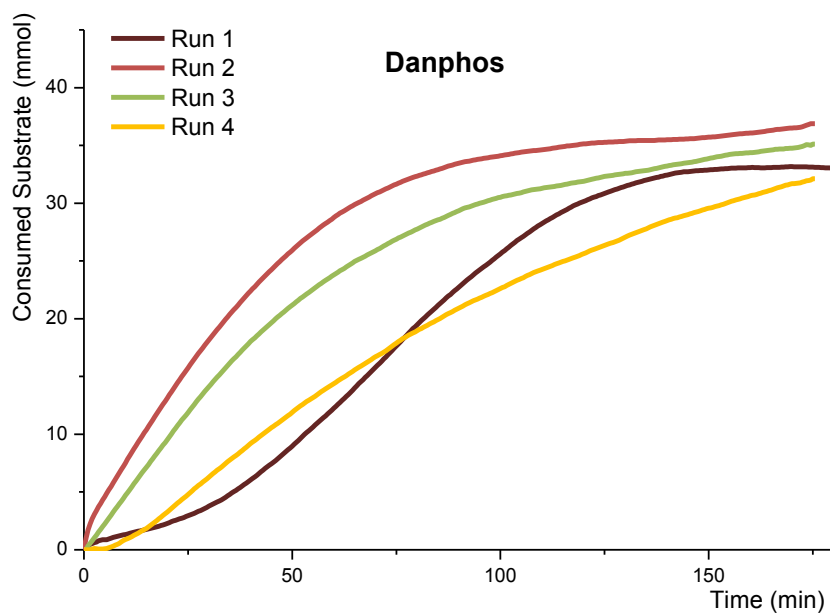

**Figure.** Substrate consumed (mmol) *versus* time (min) in the recycling experiments of the biphasic hydroformylation of vinyl acetate with Danphos phosphine. Conditions: [Rh]:[L]:[substrate] = 1:20:2500 (43.4 mmol vinyl acetate), 3 ml toluene, 5 ml H<sub>2</sub>O, 80 °C, 30 bar CO:H<sub>2</sub> (1:1).

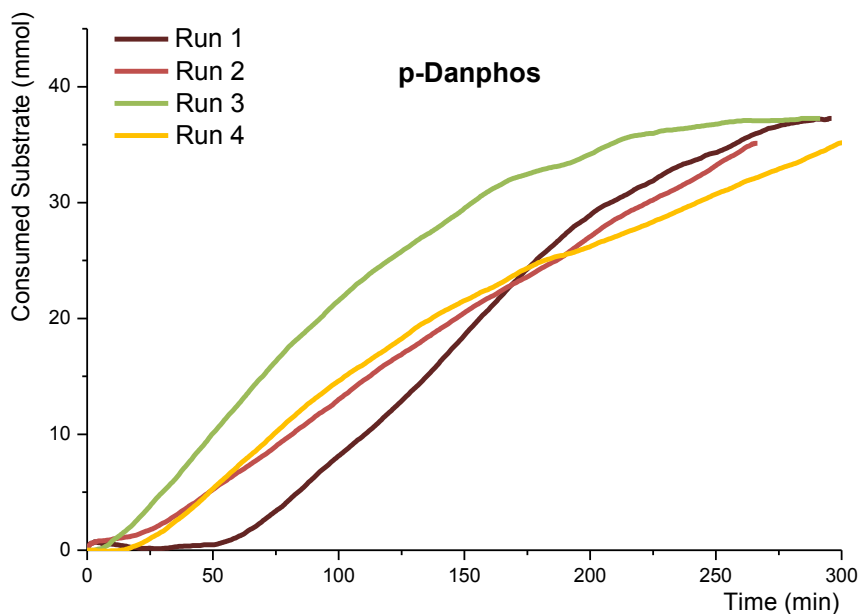

**Figure.** Substrate consumed (mmol) *versus* time (min) in the recycling experiments of the biphasic hydroformylation of vinyl acetate with *p*-Danphos phosphine. Conditions: [Rh]:[L]:[substrate] = 1:20:2500 (43.4 mmol vinyl acetate), 3 ml toluene, 5 ml H<sub>2</sub>O, 80 °C, 30 bar CO:H<sub>2</sub> (1:1).

**Reaction profile of the biphasic hydroformylation of allyl cyanide using 20 equivalents of the sulfonated phosphines.**

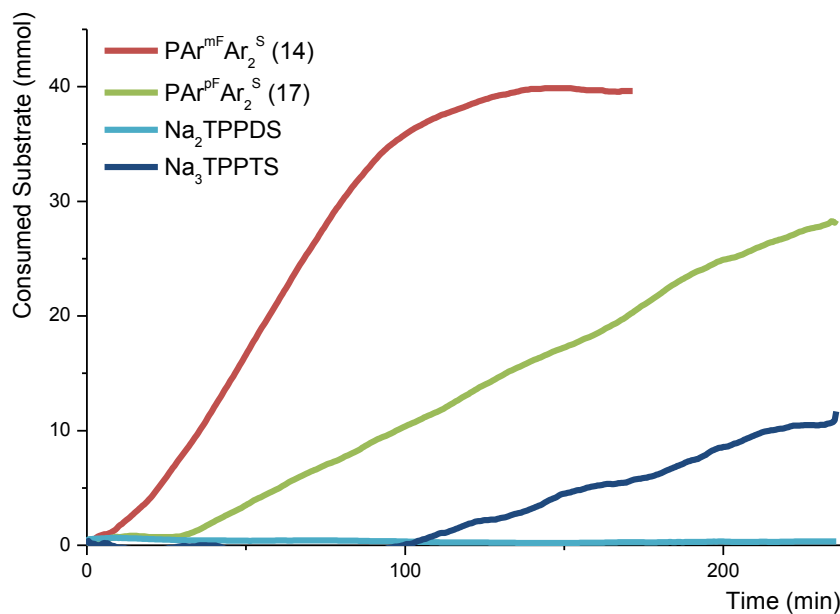

**Figure.** Substrate consumed (mmol) *versus* time (min) in the biphasic hydroformylation of allyl cyanide with sulfonated phosphines. Conditions: [Rh]:[L]:[substrate] = 1:20:2500 (43.4 mmol allyl cyanide), 3 ml toluene, 5 ml H<sub>2</sub>O, 80°C, 30 bar CO:H<sub>2</sub> (1:1).

## Reaction profile of the recycling experiments of the biphasic hydroformylation of allyl cyanide using Danphos and *p*-Danphos

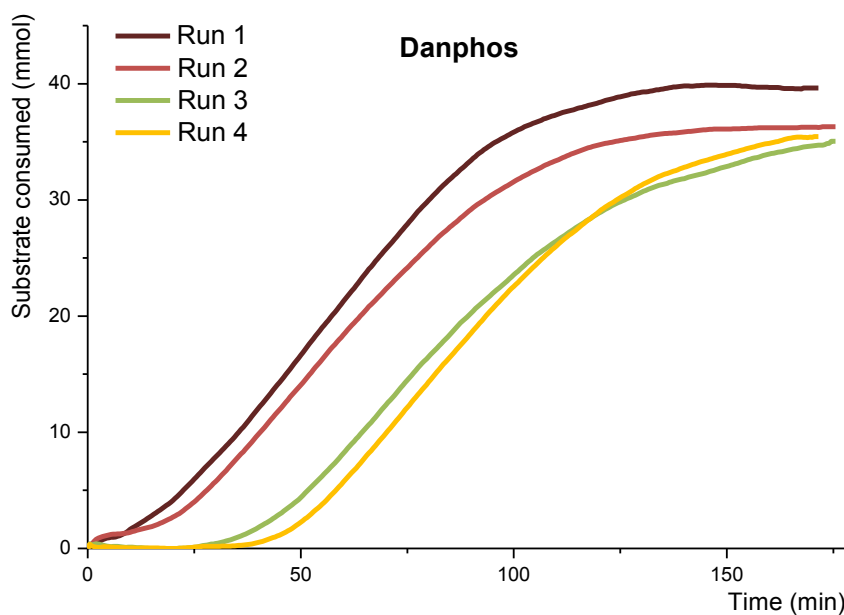

**Figure.** Substrate consumed (mmol) *versus* time (min) in the recycling experiments of the biphasic hydroformylation of allyl cyanide with Danphos phosphine. Conditions: [Rh]:[L]:[substrate] = 1:20:2500 (43.4 mmol allyl cyanide), 3 ml toluene, 5 ml H<sub>2</sub>O, 80 °C, 30 bar CO:H<sub>2</sub> (1:1).

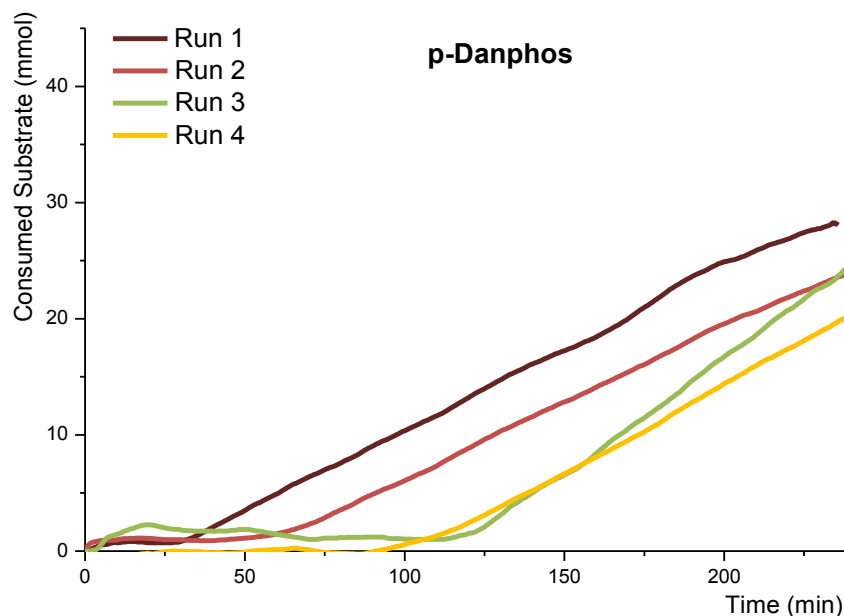

**Figure.** Substrate consumed (mmol) *versus* time (min) in the recycling experiments of the biphasic hydroformylation of allyl cyanide with *p*-Danphos phosphine. Conditions: [Rh]:[L]:[substrate] = 1:20:2500 (43.4 mmol allyl cyanide), 3 ml toluene, 5 ml H<sub>2</sub>O, 80 °C, 30 bar CO:H<sub>2</sub> (1:1).
